# Supplementary material for: Protein acetylation in skeletal muscle mitochondria is involved in impaired fatty acid oxidation and exercise intolerance in heart failure
Source: PubMed Central journal article supplement — J Cachexia Sarcopenia Muscle. 2018 Aug 30;9(5):844–59. doi: 10.1002/jcsm.12322 (PMC6204592; doi:10.1002/jcsm.12322), 2018-08-30
Supplement: JCSM-9-844-s001.pdf [file JCSM-9-844-s001.pdf]

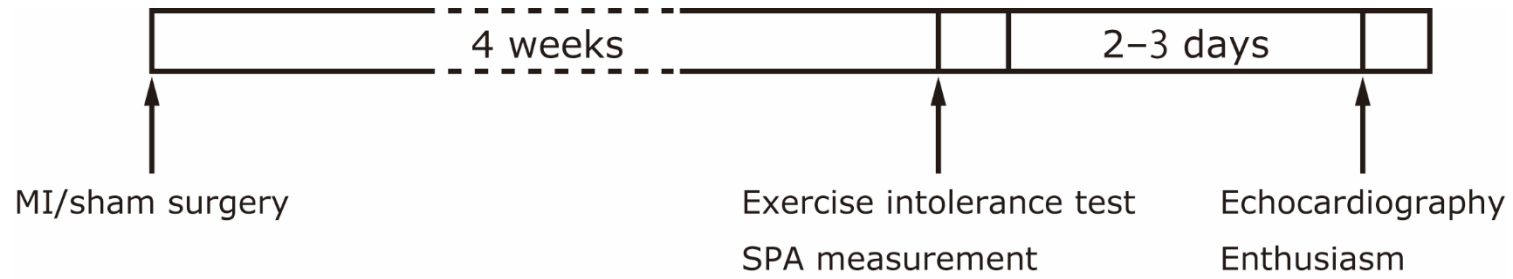

**Supplemental Fig. 1**

Schematic representation of the time schedule of the experimental protocol. SPA, spontaneous physical activity.

**A**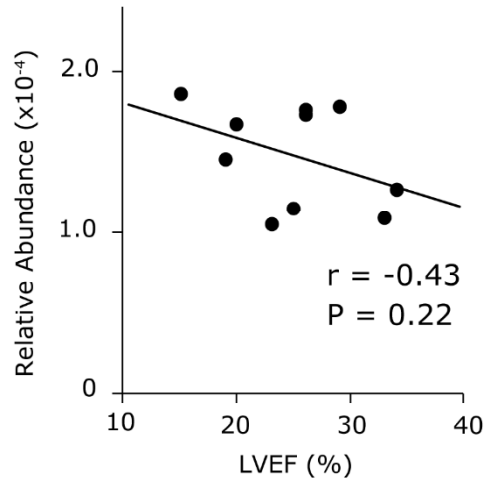**B**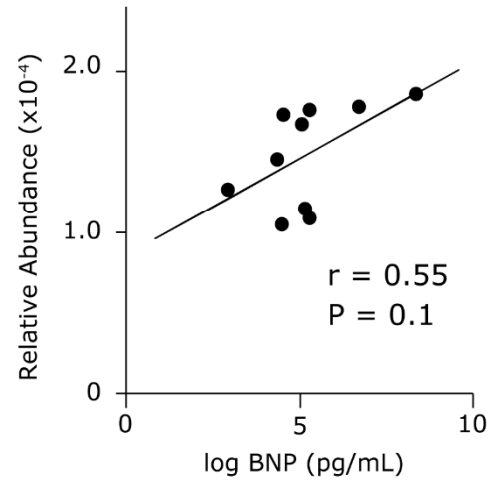**C**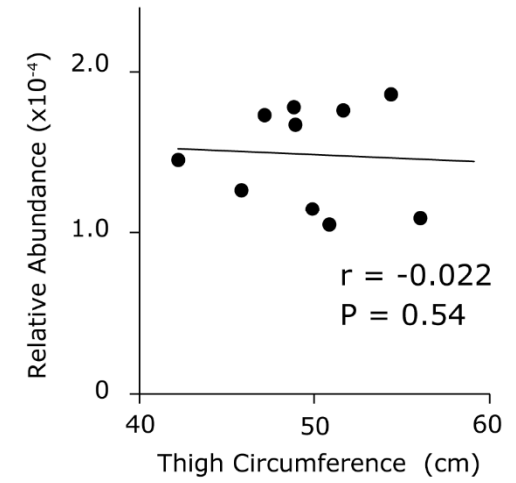**Supplemental Fig. 2**

Correlations between the plasma acetyllysine level and LVEF (A), log BNP (B), and thigh circumference (C) in the 10 patients with HF.

LVEF, left ventricular ejection fraction; BNP, brain natriuretic peptide.
